# Supplementary material for: Depletion of Cholesteryl Esters Causes Meibomian Gland Dysfunction-Like Symptoms in a Soat1-Null Mouse Model
Source: PubMed Central journal article supplement (PMC7915537; doi:10.3390/ijms22041583), 2021-02-04
Supplement: ijms-22-01583-s001.pdf [file ijms-22-01583-s001.pdf]

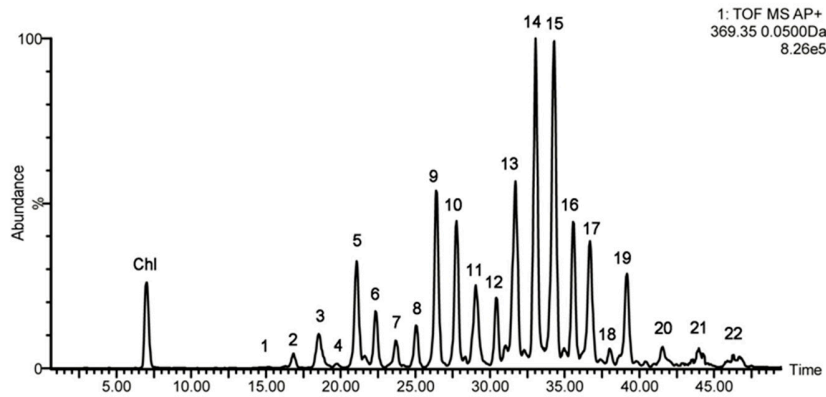

**Figure S1.** An extracted ion chromatogram of free cholesterol (Chl) and cholesteryl esters (CE) of a representative wild type mouse tarsal plate extract. A common analytical ion  $m/z$  369.35 was used to detect the analytes. The following assignments for CE were made based on the  $m/z$  values and fragmentation patterns of their  $(M + H)^+$ ,  $(M + K)^+$  and  $(M + Na)^+$  adducts: C<sub>10:0</sub> (1); C<sub>12:0</sub>- and C<sub>14:1</sub>-CE (2); C<sub>14:0</sub> and C<sub>16:1</sub> (3); C<sub>15:0</sub> (4); C<sub>16:0</sub>- and C<sub>18:1</sub>-CE (5); C<sub>17:0</sub>-CE (6); C<sub>18:0</sub>- and C<sub>20:1</sub>-CE (7); C<sub>19:0</sub>-CE (8); C<sub>20:0</sub>- and C<sub>22:1</sub>-CE (9); C<sub>21:0</sub>-CE (10); C<sub>22:0</sub>- and C<sub>24:1</sub>-CE (11); C<sub>23:0</sub>-CE (12); C<sub>24:0</sub>- and C<sub>26:1</sub>-CE (13); C<sub>25:0</sub>-CE (14); C<sub>26:0</sub>- and C<sub>28:1</sub>-CE (15); C<sub>27:0</sub>-CE (16); C<sub>28:0</sub>- and C<sub>30:1</sub>-CE (17); C<sub>29:0</sub> (18); C<sub>30:0</sub>- and C<sub>32:1</sub>-CE (19); C<sub>34:1</sub>-CE (20); cholesteryl esters of (*O*)-acyl- $\omega$ -hydroxy fatty acids (20-22).

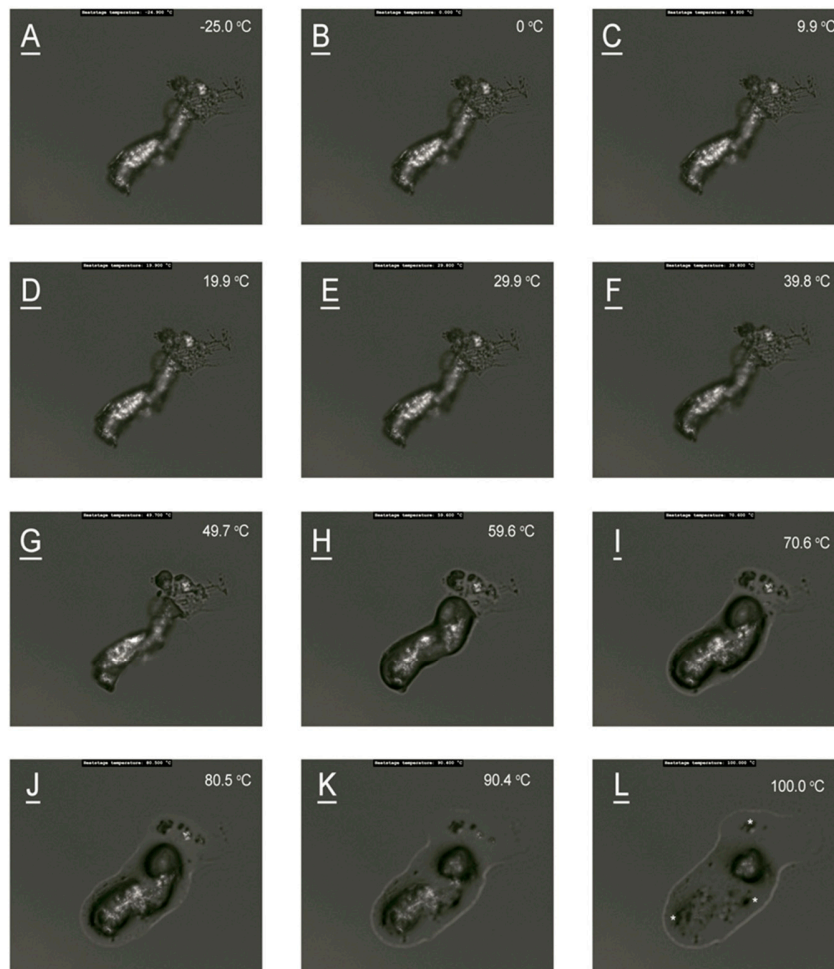

**Figure S2.** Melting of a *Soat1*-null meibum sample as recorded during a HSPLM experiment. Sample temperatures rose from  $-25\text{ }^{\circ}\text{C}$  to  $+100\text{ }^{\circ}\text{C}$  with a rate of  $2\text{ }^{\circ}\text{C}/\text{min}$ . Bright structures visible within the meibum sample are birefringent lipid aggregates. Note that some aggregates did not melt even at the highest temperature. Dark, non-melting, non-birefringent aggregates of presumably proteinaceous nature are labeled with white asterisks in Panel L.
